# Supplementary material for: Chemical vapor crosslinking of graphene oxide membranes for controlling nanochannels
Source: Royal Society of Chemistry journal article supplement (doi:10.1039/d0en00710b), 2020-01-01
Supplement: d0en00710b1.pdf [file d0en00710b1.pdf]

## **Electronic Supplementary Information**

### **Chemical vapor crosslinking of graphene oxide membranes for controlling nanochannels**

**Jingyi Su, Miaomiao Jia, Wufeng Wu, Zhanjun Li and Wanbin Li\***

*School of Environment and Guangdong Key Laboratory of Environmental Pollution  
and Health, Jinan University, Guangzhou 511443, P.R. China.*

*Corresponding author E-mail: [gandeylin@126.com](mailto:gandeylin@126.com)*

## **Experimental details:**

### **Materials**

The graphite oxide power was purchased from XFnano chemical Co., Ltd., China. Ethylenediamine (EDA) was purchased from Xinhong Chemical Reagent Co., China. Sodium sulphate ( $\text{Na}_2\text{SO}_4$ ), sodium chloride (NaCl), magnesium sulphate ( $\text{MgSO}_4$ ), magnesium chloride (MgCl), and polyethersulfone (PES) with pore size of 0.2  $\mu\text{m}$  were obtained from Kutai Chemical Reagent Co., China.

### **Fabrication of GO and GO-EDA membranes**

To produce GO suspension with concentration of 1.0  $\text{mg mL}^{-1}$ , 50 mg of graphite oxide was added to 50 mL of deionized (DI) water, followed by ultrasonication for 2 h. A certain volume of the GO suspension was diluted to 20  $\mu\text{g mL}^{-1}$  and 40  $\mu\text{g mL}^{-1}$ . The diluted solution (10 mL) was filtered onto a PES substrate with pore size of 0.2  $\mu\text{m}$  by vacuum filtration to prepare the GO membrane. The EDA monomer was added to GO suspension (60 mL, 20  $\mu\text{g L}^{-1}$ ) to prepare a 0.1 M solution. After stirring for 2 h at room temperature, 10 mL of GO-EDA solution was filtered onto the PES substrate by vacuum filtration to prepare the GO-EDA-V membrane. The GO-EDA membrane was prepared by chemical vapor deposition (CVD). The GO membrane was dried at room temperature for 24 h before it was crosslinked by EDA. Briefly, 20 mL of EDA was poured into a beaker, and a holder was placed above EDA. The holder was not contacted with EDA. The GO membrane was placed on the holder with GO facing EDA. Then, the beaker was sealed and thermally treated at 40  $^{\circ}\text{C}$  for vapor deposition. The

deposition durations were 15, 30, and 45 min, respectively. After deposition, the obtained GO-EDA membrane was heat-treated at 80 °C for 1 h to realize further crosslinking of GO and EDA, and then immersed into DI water for 10 h to remove uncrosslinked EDA. Ultimately, the prepared GO-EDA membrane was dried at room temperature.

### **Characterizations**

The top and cross-section morphologies of membranes were observed by a scanning electron microscope (SEM, Ultra-55, Zeiss Co.). The acceleration voltage was 5 kV. Fourier transform infrared spectrometer (FTIR, IRTracer-100, Shimadzu Co.) was employed to investigate the chemical structures of membranes. X-ray photoelectron spectroscopy (XPS) was applied to analyze the chemical compositions of membranes. The crystalline properties of membranes were acquired by an X-ray diffractometer (XRD) at 30 kV and 10 mA. The interlayer spacing was calculated by Bragg's Law:

$$\lambda = 2d \sin \theta \quad (1)$$

where  $\lambda$  is the wavelength of Cu X-ray beam (0.15406 nm),  $d$  is the interlayer spacing of GO laminates, and  $\theta$  is the diffraction angle.

### **Separation performance**

A cross-flow filtration system with an effective filtration area of 7.0 cm<sup>2</sup> was used to investigate permeance of DI water and the salt rejection of the membranes. The desalination tests were performed with different salt solutions with the concentration of 500 ppm, an applied pressure of 2.0 bar, and a flow of 30 L h<sup>-1</sup> at room temperature.

The data were recorded after the system ran stably. To ensure repeatability, the experiments were carried out at least three times. The conductivity of the collected permeation was measured with a conductivity meter, and the water permeance and the rejection rate was calculated by the following equations, respectively:

$$P = \frac{V}{Ap\Delta t} \quad (2)$$

$$R = \left(1 - \frac{C_p}{C_f}\right) \times 100\% \quad (3)$$

where  $P$  is the permeance of DI water,  $V$  is the volume of permeate water,  $A$  is the effective filtration area,  $p$  is the applied pressure,  $\Delta t$  is the permeate time,  $R$  is the rejection,  $C_p$  and  $C_f$  are the salt concentrations of the feed and permeate solutions, respectively.

### **Ion permeation**

The ion permeation experiment of the membrane was performed by U-tube. Thirty milliliters of DI water was added in the permeate side and 30 mL of salt solution with concentration of 2.0 M was added in the feed side. The membrane was facing the permeate solution. The solutions on both sides were stirred by magnetic rotors. The conductivity of the permeate solution was measured at regular intervals for 2 h.

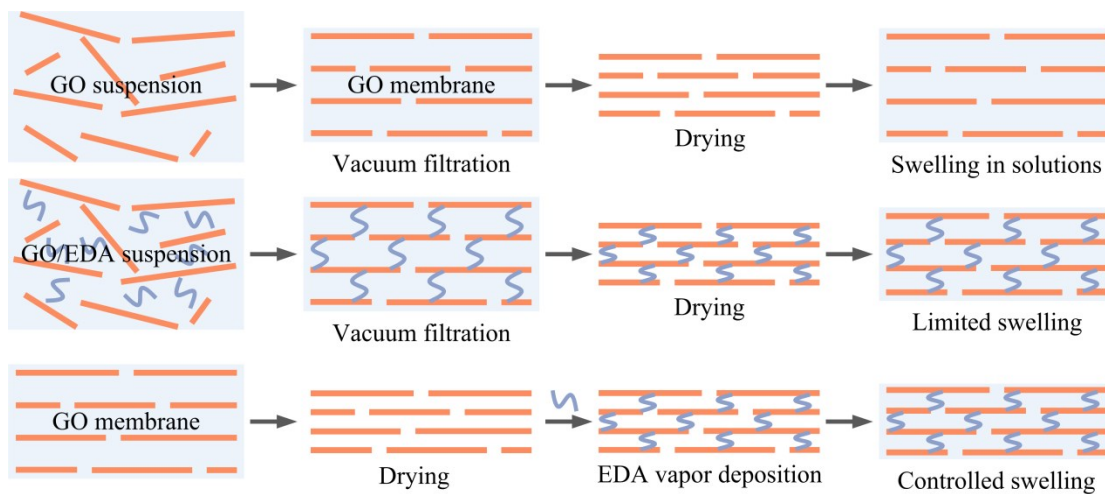

**Fig. S1** Illustration of the GO membrane and the GO-EDA membranes prepared by vacuum filtration and CVD.

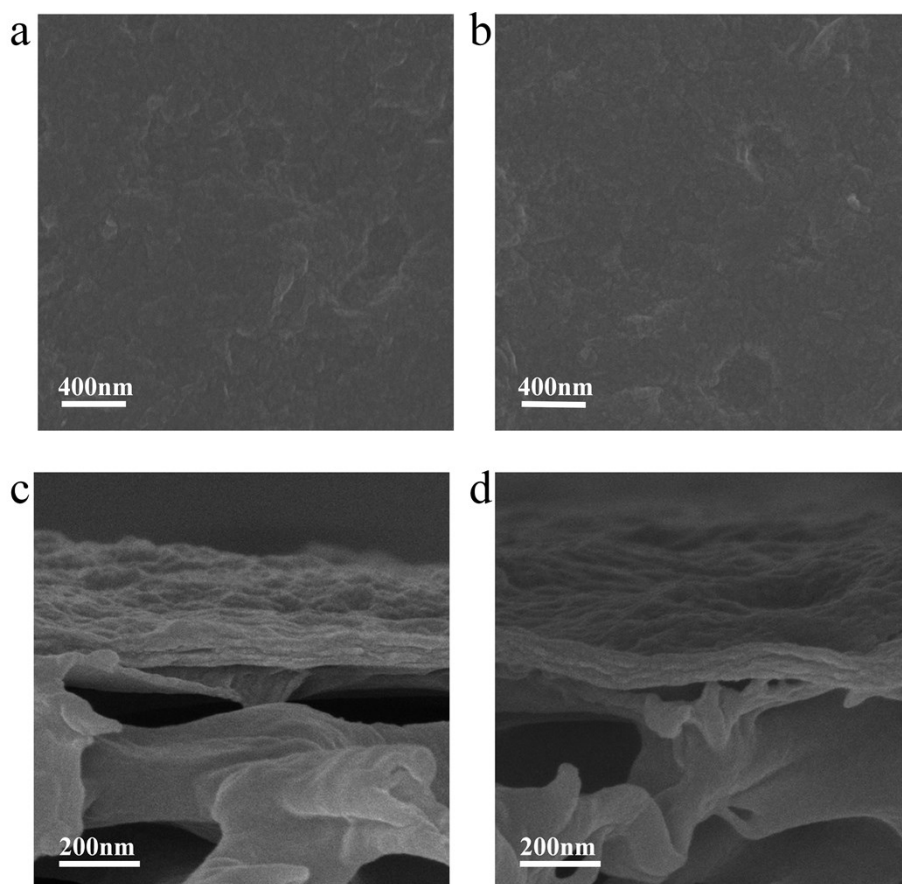

**Fig. S2** SEM images of (a,b) top and (c,d) cross-sectional views of the GO-EDA membrane vapor-deposited for (a,c) 15 min and (b,d) 45 min. These membranes were prepared with concentration of  $20 \mu\text{g mL}^{-1}$ .

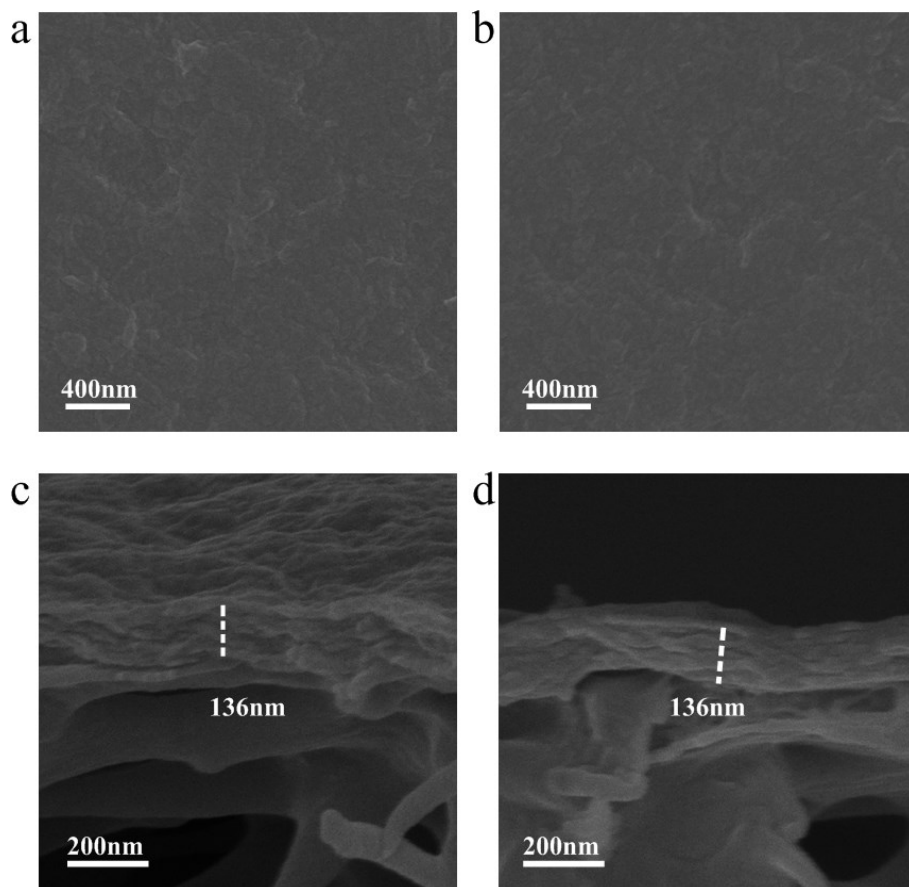

**Fig. S3** SEM images of (a,b) top and (c,d) cross-sectional views of (a,c) the pristine GO membrane and (b,d) the GO-EDA membrane vapor-deposited for 30 min. These membranes were prepared with concentration of  $40 \mu\text{g mL}^{-1}$ .

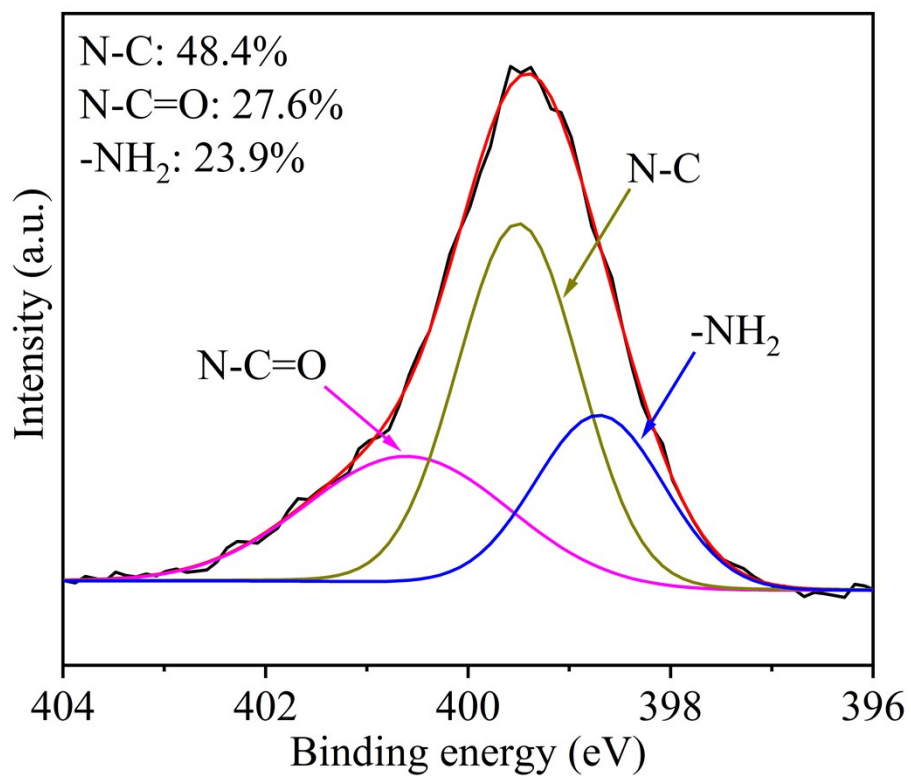

**Fig. S4** XPS N 1s spectrum of the GO-EDA membrane.



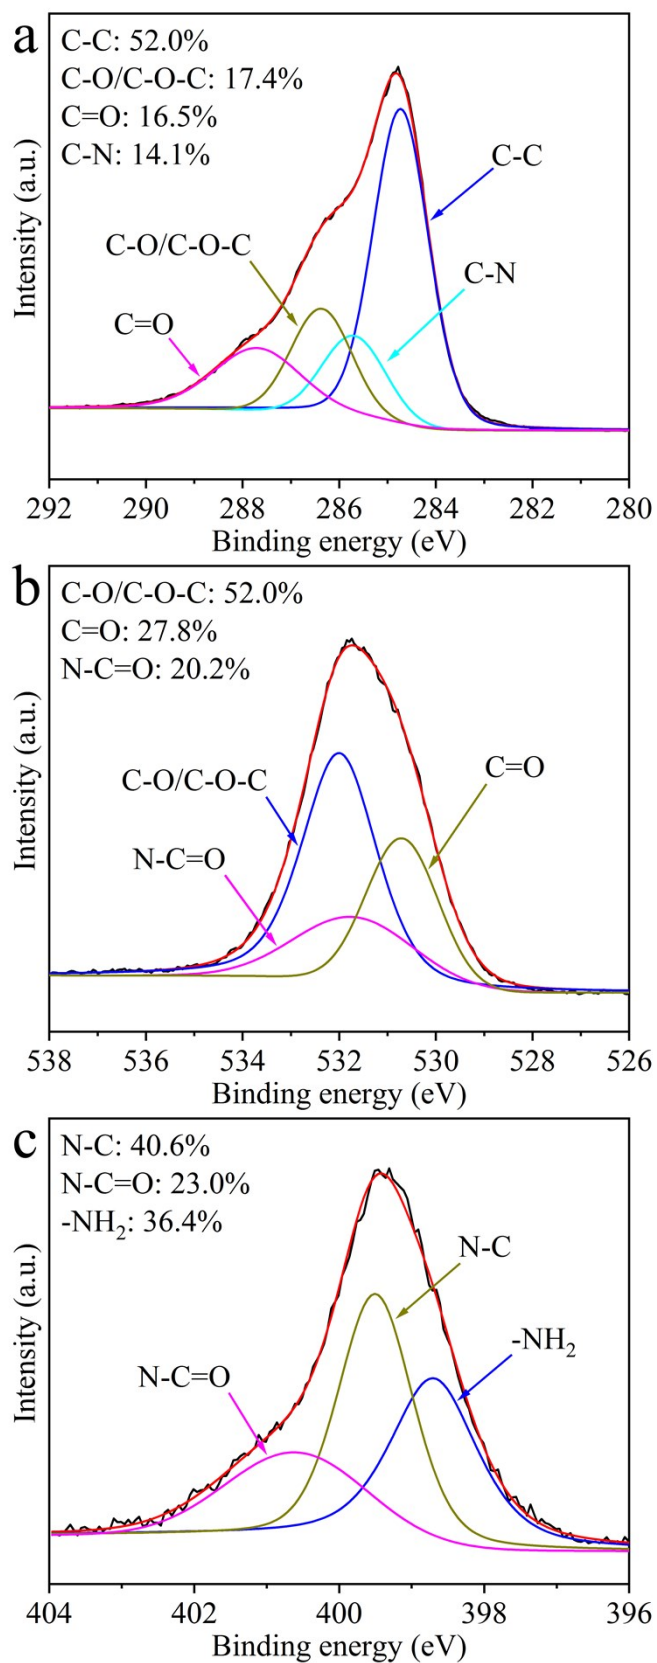

**Fig. S5** XPS (a) C 1s, (b) O 1s, and (c) N 1s spectra of the GO-EDA-V membrane.

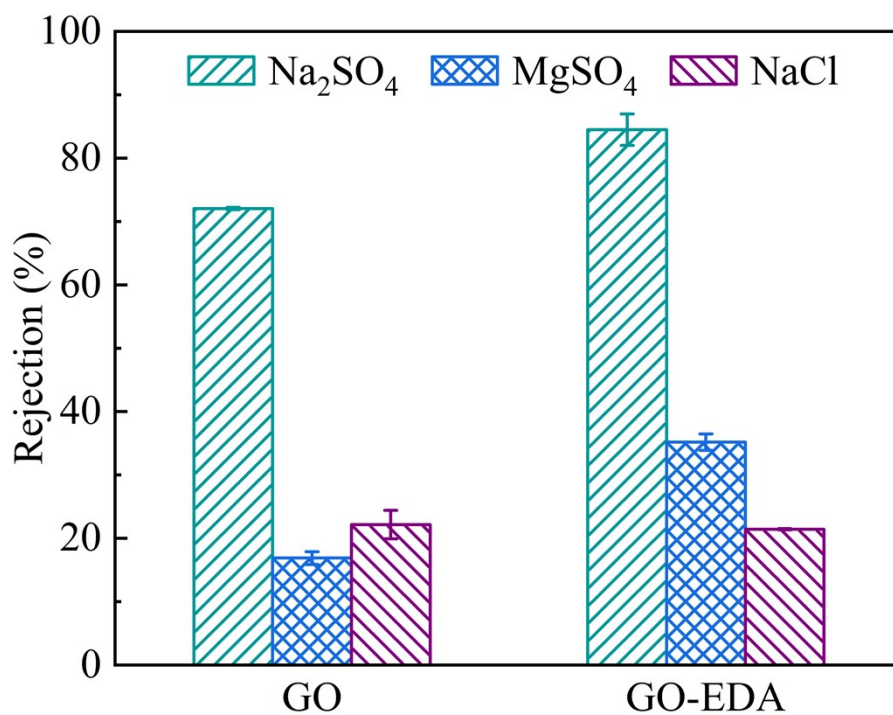

**Fig. S6** Na<sub>2</sub>SO<sub>4</sub>, MgSO<sub>4</sub>, and NaCl rejections of GO and GO-EDA membranes with GO loading of 400 μg.

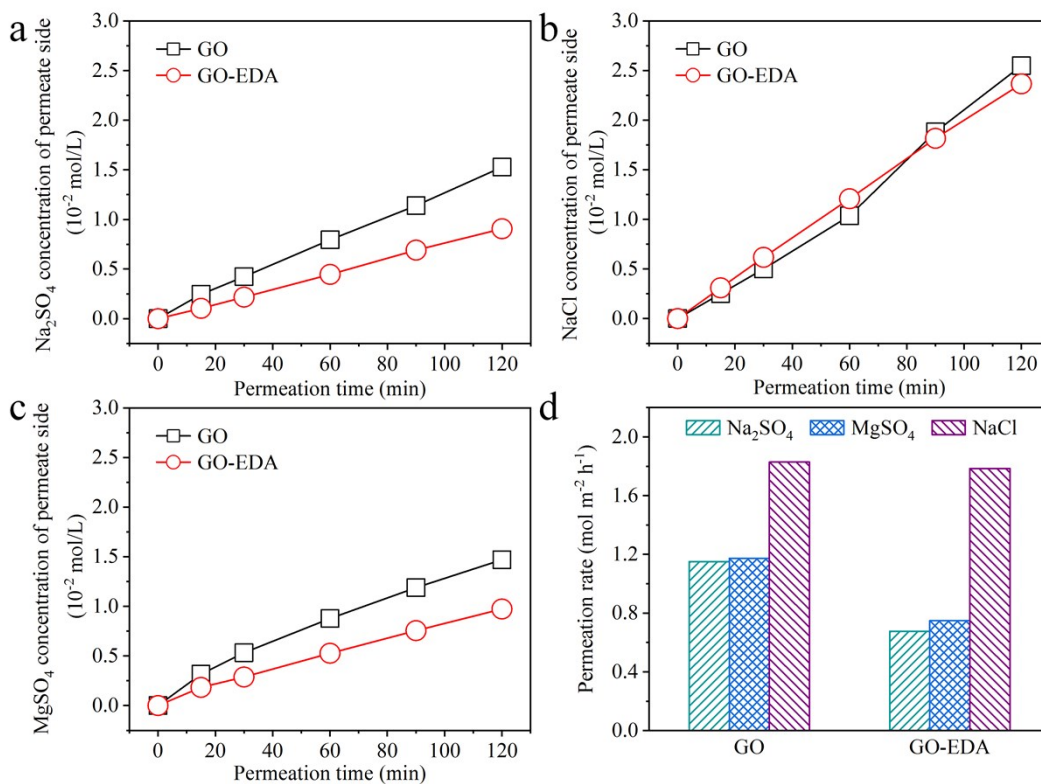

**Fig. S7** (a)  $\text{Na}_2\text{SO}_4$ , (b) NaCl, and (c)  $\text{MgSO}_4$  concentrations of permeate side with permeation time. (d)  $\text{Na}_2\text{SO}_4$ , NaCl, and  $\text{MgSO}_4$  permeation rates of GO and GO-EDA membranes. These membranes were prepared with concentration of  $20 \mu\text{g mL}^{-1}$ .

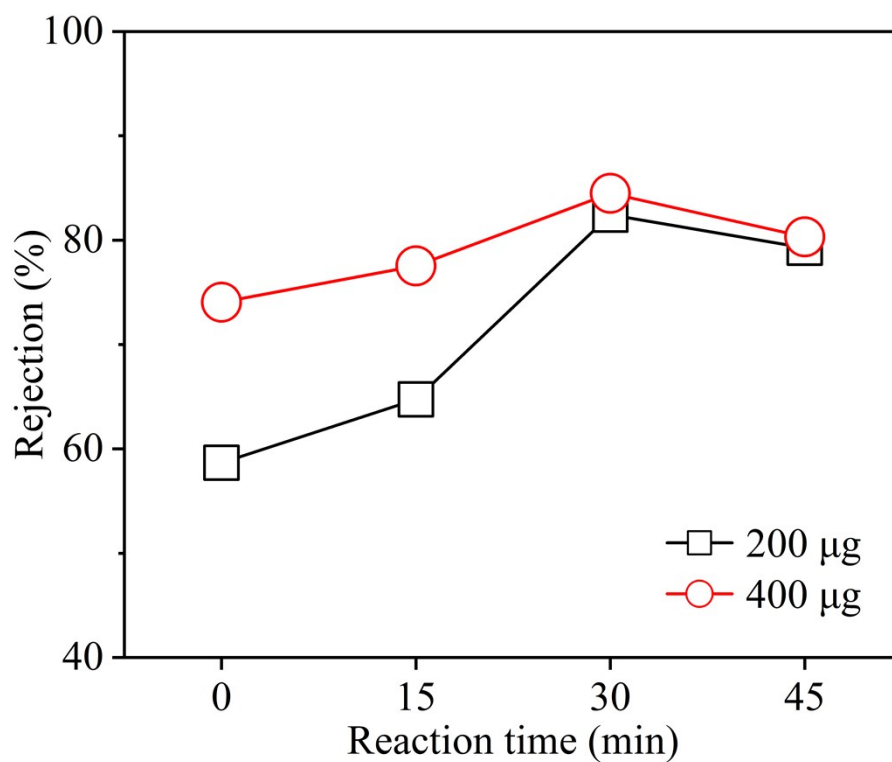

**Fig. S8**  $\text{Na}_2\text{SO}_4$  rejection of GO-EDA membranes with different reaction durations.

**Table S1** Desalination performance of different GO membranes for Na<sub>2</sub>SO<sub>4</sub> solution.

| Membrane                | Concentration<br>(ppm) | Water permeance<br>(L m <sup>-2</sup> h <sup>-1</sup> bar <sup>-1</sup> ) | Rejection<br>(%) | Ref       |
|-------------------------|------------------------|---------------------------------------------------------------------------|------------------|-----------|
| TMPyP/GO                | 2000                   | 1.2                                                                       | 87.7             | 1         |
| TMC/GO,<br>Polydopamine | 1420                   | 276                                                                       | 26               | 2         |
| GO @ PAN                | -                      | 2.0                                                                       | 56.7             | 3         |
| brGO                    | 2840                   | 3.26                                                                      | 60.0             | 4         |
| BPPO/EDA/GO             | 1000                   | 4.1                                                                       | 56.2             | 5         |
| GO/TiO <sub>2</sub>     | 710                    | 89.6                                                                      | 60.6             | 6         |
| GO-EDA                  | 500                    | 2.3                                                                       | 82.4             | This work |

## References

- 1 X. Xu, F. Lin, Y. Du, X. Zhang, J. Wu and Z. Xu, Graphene oxide nanofiltration membranes stabilized by cationic porphyrin for high salt rejection, *ACS Appl. Mater. Interfaces*, 2016, **8**, 12588-12593.
- 2 M. Hu and B. Mi, Enabling Graphene oxide nanosheets as water separation membranes, *Environ. Sci. Technol.*, 2013, **47**, 3715-3723.
- 3 J. Wang, P. Zhang, B. Liang, Y. Liu, T. Xu, L. Wang, B. Cao and K. Pan, Graphene oxide as an effective barrier on a porous nanofibrous membrane for water treatment, *ACS Appl. Mater. Interfaces*, 2016, **8**, 6211-6218.
- 4 Y. Han, Z. Xu and C. Gao, Ultrathin graphene nanofiltration membrane for water purification, *Adv. Funct. Mater.*, 2013, **23**, 3693-3700.
- 5 N. Meng, W. Zhao,, E. Shamsaei, G. Wang, X. Zeng, X. Lin, T. Xu, H. Wang and X. Zhang, A low-pressure GO nanofiltration membrane crosslinked via ethylenediamine, *J. Membr. Sci.*, 2018, **548**, 363-371.
- 6 R. Han and P. Wu, High-performance graphene oxide nanofiltration membrane with continuous nanochannels prepared by the in situ oxidation of MXene, *J. Mater. Chem. A*, 2019, **7**, 6475-6481.
